# Supplementary material
Source: PubMed Central journal article supplement (PMC5042671)
Supplement: ASN.2015101121SupplementaryData.pdf [file ASN.2015101121SupplementaryData.pdf]

Supplementary Figure S1: Regional plot of association with plasma total ApoL1 levels at the UBD locus. Each dot represents a SNP plotted against its chromosomal position (using hg19 coordinates). The vertical axis shows  $-\log_{10}$  p-values from single-SNP analysis for association with ApoL1 levels. The most significant SNP at the locus is shown in purple color. The remaining SNPs are color-coded according to their LD with the lead SNP as indicated by the color-key. The strength of LD is measured by pairwise  $R^2$  values based on the DHS data. Estimated recombination rates (from HapMap) are shown by the blue line, with spikes indicating locations of frequent recombination. Genes located in the region and the direction of transcription are noted below the plots based on the data from UCSC genome browser (genome.ucsc.edu). Upside triangles denote nonsynonymous variants, squares - coding variants, and filled and open circles - SNPs with no functional annotation and non-coding variants. The plot was generated using LocusZoom software.

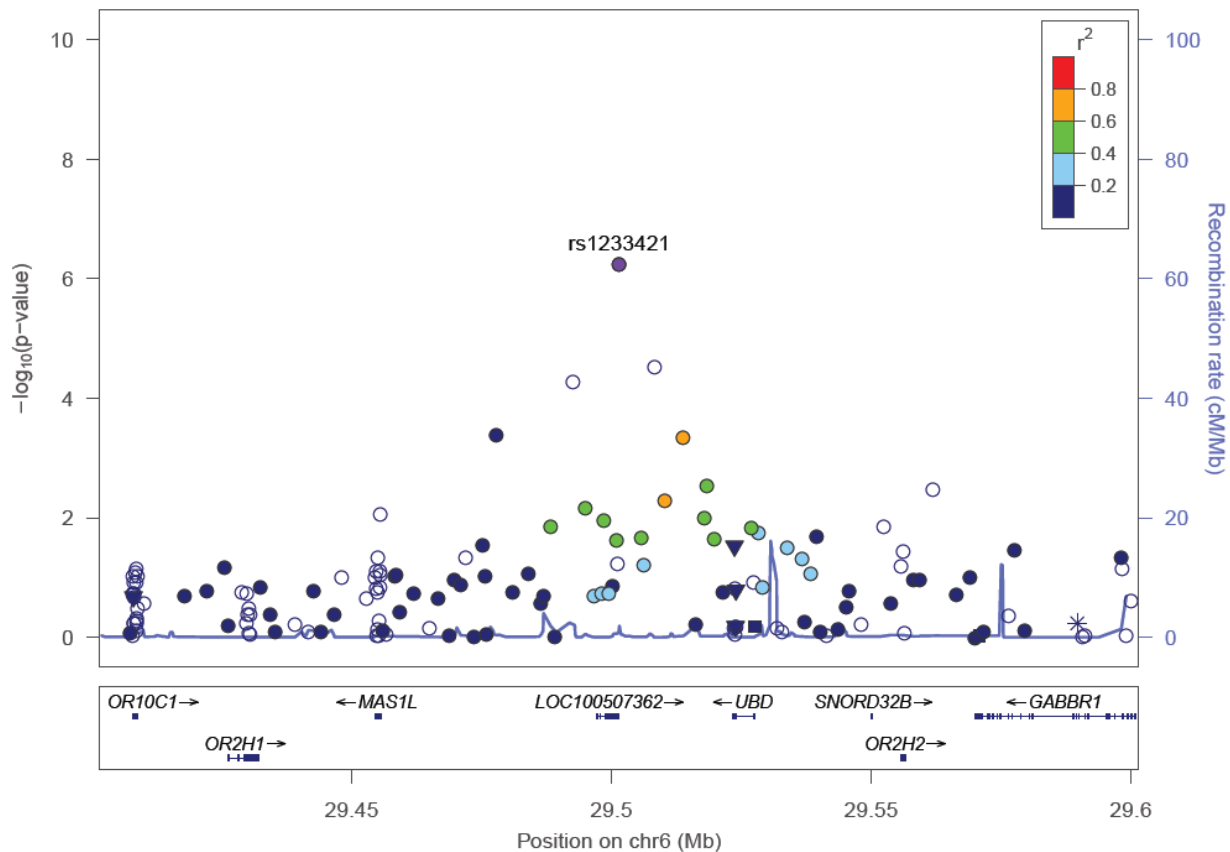

**Supplementary Table 1.** Association of *APOL1* risk alleles (G1/G2) determined by MS and chronic kidney disease in DHS African Americans (n=1786)

| <b>Characteristic</b>   | <b>0 copies<br/>(n=706)</b> | <b>1 copy<br/>(n=858)</b> | <b>2 copies<br/>(n=222)</b> | <b>P-value<br/>(additive<br/>model)</b> | <b>P-value<br/>(recessive<br/>model)</b> |
|-------------------------|-----------------------------|---------------------------|-----------------------------|-----------------------------------------|------------------------------------------|
| CKD, n (%)              |                             |                           |                             |                                         |                                          |
| All (n=1676)            | 68 (10.0)                   | 95 (11.5)                 | 44 (20.2)                   | 0.00017                                 | <0.0001                                  |
| Non-diabetic (n=1436)   | 38 (6.6)                    | 54 (7.6)                  | 37 (19.7)                   | <0.0001                                 | <0.0001                                  |
| Diabetic (n=240)        | 30 (29.4)                   | 41 (34.7)                 | 7 (23.3)                    | 0.89                                    | 0.46                                     |
| Microalbuminuria, n (%) |                             |                           |                             |                                         |                                          |
| All (n=1670)            | 61 (9.0)                    | 83 (10.0)                 | 37 (17.2)                   | 0.0012                                  | 0.00023                                  |
| Non-diabetic (n=1431)   | 34 (5.9)                    | 48 (6.8)                  | 30 (16.2)                   | <0.0001                                 | <0.0001                                  |
| Diabetic (n=239)        | 27 (26.5)                   | 35 (29.9)                 | 7 (23.3)                    | 0.91                                    | 0.71                                     |
| GFR <60, n (%)          |                             |                           |                             |                                         |                                          |
| All (n=1732)            | 17 (2.4)                    | 23 (2.7)                  | 15 (6.8)                    | 0.0063                                  | 0.0012                                   |
| Non-diabetic (n=1489)   | 12 (2.0)                    | 12 (1.6)                  | 14 (7.3)                    | 0.0032                                  | <0.0001                                  |
| Diabetic (n=243)        | 5 (4.9)                     | 11 (9.0)                  | 1 (3.3)                     | 0.78                                    | 0.45                                     |
| GFR <30, n (%)          | 5 (0.7)                     | 3 (0.3)                   | 6 (2.7)                     | 0.073                                   | 0.0031                                   |

The prevalence of CKD is compared across genotypes using logistic regression models, adjusted for age, gender, systolic BP and diabetes, where appropriate.

Microalbuminuria - urine albumin/creatinine ratio (ACR)  $\geq 17$  mg/g in men or  $\geq 25$  mg/g in women. GFR - glomerular filtration rate. CKD - chronic kidney disease; defined as the presence of microalbuminuria and/or GFR  $< 60$  ml/min/1.73 m<sup>2</sup>.

**Supplementary Table 2.** Association between circulating APOL1 levels and chronic kidney disease in DHS African Americans

| Outcome          | APOL1 protein | N subjects | Model 1          |         | Model 2          |         |
|------------------|---------------|------------|------------------|---------|------------------|---------|
|                  |               |            | OR (95% CI)      | P-value | OR (95% CI)      | P-value |
| CKD              | Total APOL1   | 1729       | 0.97 (0.83-1.14) | 0.75    | 1.00 (0.86-1.17) | 0.97    |
|                  | WT APOL1      | 1453       | 1.00 (0.83-1.19) | 0.96    | 1.11 (0.87-1.42) | 0.39    |
|                  | G1 APOL1      | 686        | 1.22 (0.99-1.50) | 0.063   | 1.18 (0.92-1.52) | 0.2     |
|                  | G2 APOL1      | 463        | 1.23 (0.94-1.62) | 0.13    | 1.28 (0.93-1.75) | 0.13    |
|                  | G1+G2 APOL1   | 1038       | 1.32 (1.11-1.57) | 0.0014  | 1.16 (0.93-1.44) | 0.19    |
| Microalbuminuria | Total APOL1   | 1723       | 0.95 (0.81-1.13) | 0.58    | 0.98 (0.82-1.16) | 0.78    |
|                  | WT APOL1      | 1450       | 0.98 (0.81-1.2)  | 0.88    | 1.07 (0.83-1.39) | 0.6     |
|                  | G1 APOL1      | 681        | 1.2 (0.97-1.5)   | 0.099   | 1.15 (0.88-1.51) | 0.31    |
|                  | G2 APOL1      | 461        | 1.12 (0.83-1.51) | 0.46    | 1.14 (0.82-1.6)  | 0.44    |
|                  | G1+G2 APOL1   | 1032       | 1.26 (1.05-1.52) | 0.012   | 1.1 (0.87-1.39)  | 0.43    |
| GFR <60          | Total APOL1   | 1788       | 0.79 (0.59-1.07) | 0.13    | 0.82 (0.61-1.11) | 0.21    |
|                  | WT APOL1      | 1504       | 0.95 (0.68-1.33) | 0.76    | 1.01 (0.65-1.57) | 0.96    |
|                  | G1 APOL1      | 702        | 1.01 (0.67-1.52) | 0.95    | 0.92 (0.58-1.47) | 0.73    |
|                  | G2 APOL1      | 478        | 1.57 (1.04-2.36) | 0.03    | 1.86 (1.08-3.2)  | 0.025   |
|                  | G1+G2 APOL1   | 1069       | 1.34 (1.02-1.78) | 0.038   | 1.06 (0.73-1.55) | 0.75    |

The analysis includes all DHS African American participants with available data on microalbuminuria, GFR and total CKD. The analysis of allele-specific protein levels is restricted to individuals who carry at least one copy of the corresponding allele. For example, the analysis of wild-type APOL1 levels is confined to individuals with 0 or 1 copies of the G1 and G2 alleles. The analysis of total levels of the variant protein (G1 + G2 APOL1) is restricted to individuals with at least 1 copy of the variant alleles (G1 or G2). Model 1 includes age, gender, systolic BP and diabetes as covariates. Model 2 is additionally adjusted for the number of copies of the risk alleles. Odds ratios (OR) are calculated per 1 SD increase in circulating APOL1 levels. N subjects – number of individuals included in each analysis; 95% CI – 95% confidence interval.

**Supplementary Table 3.** Association between circulating ApoL1 levels and chronic kidney disease in DHS African Americans stratified by the number of *APOL1* risk alleles

| Outcome          | APOL1 protein | 1 risk allele |                  |       | 2 risk alleles |                   |       |
|------------------|---------------|---------------|------------------|-------|----------------|-------------------|-------|
|                  |               | N             | OR (95% CI)      | P     | N              | OR (95% CI)       | P     |
| CKD              | Total APOL1   | 811           | 0.97 (0.76-1.23) | 0.79  | 226            | 1.04 (0.73-1.49)  | 0.82  |
|                  | WT APOL1      | 811           | 1.07 (0.76-1.51) | 0.71  | -              | -                 | -     |
|                  | G1 APOL1      | 602           | 1.21 (0.86-1.71) | 0.28  | 83             | 1.32 (0.89-1.94)  | 0.16  |
|                  | G2 APOL1      | 424           | 1.10 (0.74-1.64) | 0.63  | 38             | 1.44 (0.82-2.53)  | 0.2   |
|                  | G1+G2 APOL1   | 811           | 1.10 (0.76-1.58) | 0.61  | 226            | 1.29 (0.98-1.70)  | 0.065 |
| Microalbuminuria | Total APOL1   | 808           | 0.96 (0.74-1.24) | 0.75  | 223            | 0.96 (0.65-1.43)  | 0.86  |
|                  | WT APOL1      | 808           | 1.04 (0.72-1.51) | 0.83  | -              | -                 | -     |
|                  | G1 APOL1      | 598           | 1.10 (0.76-1.61) | 0.61  | 82             | 1.39 (0.92-2.10)  | 0.12  |
|                  | G2 APOL1      | 423           | 0.92 (0.6-1.41)  | 0.7   | 37             | 1.29 (0.72-2.29)  | 0.39  |
|                  | G1+G2 APOL1   | 808           | 1.04 (0.7-1.54)  | 0.84  | 223            | 1.22 (0.92-1.64)  | 0.17  |
| GFR <60          | Total APOL1   | 837           | 0.95 (0.62-1.46) | 0.81  | 231            | 0.79 (0.42-1.47)  | 0.45  |
|                  | WT APOL1      | 837           | 1.13 (0.64-2.00) | 0.68  | -              | -                 | -     |
|                  | G1 APOL1      | 617           | 1.19 (0.66-2.15) | 0.56  | 84             | 0.62 (0.23-1.64)  | 0.34  |
|                  | G2 APOL1      | 435           | 1.83 (0.94-3.54) | 0.074 | 42             | 4.48 (0.43-46.69) | 0.21  |
|                  | G1+G2 APOL1   | 837           | 1.33 (0.69-2.54) | 0.39  | 231            | 1.09 (0.68-1.76)  | 0.71  |

The analysis includes all DHS African American participants with available data on microalbuminuria, GFR and total CKD. The analysis of allele-specific protein levels is restricted to individuals who carry at least one copy of the corresponding allele. For example, the analysis of wild-type APOL1 levels is confined to individuals with 0 or 1 copies of the G1 and G2 alleles. The analysis of total levels of the variant protein (G1 + G2 APOL1) is restricted to individuals with at least 1 copy of the variant alleles (G1 or G2). Odds ratios (OR) are calculated per 1 SD increase in circulating APOL1 levels. N – number of individuals included in each analysis; 95% CI – 95% confidence interval.

**Supplementary Table 4.** Variants associated with plasma total APOL1 levels in exome-wide analysis in DHS (n=3354)

| SNP        | Chr. | Position | Gene    | AA change | EA | EAF (%) |      |      | BETA (s.d. units) | P-value (single-SNP) | P-value (conditional on rs35370634) | P-value (joint analysis) |
|------------|------|----------|---------|-----------|----|---------|------|------|-------------------|----------------------|-------------------------------------|--------------------------|
|            |      |          |         |           |    | AFR     | EUR  | HIS  |                   |                      |                                     |                          |
| rs1233421  | 6    | 29501514 |         |           | A  | 53.2    | 47.1 | 43.8 | 0.11              | 4.90E-07             | 2.51E-06                            | 1.42E-06                 |
| rs7197514  | 16   | 65652630 |         |           | G  | 63.9    | 1.9  | 8.2  | 0.16              | 5.45E-08             | 3.30E-07                            |                          |
| rs1110471  | 16   | 66350593 |         |           | A  | 15.7    | 84.9 | 78.6 | -0.20             | 1.91E-11             | 7.53E-10                            |                          |
| rs9928279  | 16   | 66527099 | BEAN1   | K128E     | G  | 22.5    | 0.3  | 2.9  | 0.17              | 3.11E-07             | 1.64E-06                            |                          |
| rs9932319  | 16   | 67131601 | CBFB    |           | G  | 72.1    | 8.0  | 14.1 | 0.15              | 4.65E-08             | 1.38E-06                            |                          |
| rs12923138 | 16   | 67233266 | ELMO3   | K66Q      | A  | 10.3    | 57.5 | 54.7 | -0.15             | 2.31E-08             | 5.43E-08                            |                          |
| rs8044843  | 16   | 67318242 | PLEKHG4 | D525G     | G  | 64.7    | 11.7 | 15.5 | 0.14              | 4.26E-08             | 1.23E-07                            |                          |
| rs3868142  | 16   | 67320223 | PLEKHG4 | R830H     | A  | 58.2    | 8.6  | 10.6 | 0.16              | 6.67E-10             | 6.11E-09                            |                          |
| rs9922085  | 16   | 67397580 | LRRC36  | R222P     | G  | 52.8    | 5.0  | 9.5  | 0.17              | 1.04E-10             | 1.55E-09                            |                          |
| rs8052655  | 16   | 67409180 | LRRC36  | G509S     | A  | 52.8    | 5.0  | 9.5  | 0.17              | 9.61E-11             | 1.48E-09                            | 2.66E-07                 |
| rs6979     | 16   | 67691668 | ACD     | V518A     | A  | 9.5     | 50.1 | 52.4 | -0.14             | 2.17E-07             | 2.37E-07                            |                          |
| rs1424114  | 16   | 69224615 | SNTB2   |           | G  | 15.0    | 63.3 | 68.1 | -0.15             | 1.26E-08             | 5.04E-08                            |                          |
| rs11537667 | 16   | 70303659 | AARS    | G275D     | A  | 24.6    | 0.3  | 2.9  | 0.18              | 9.13E-08             | 8.55E-07                            |                          |
| rs7195567  | 16   | 70351429 | DDX19B  |           | C  | 24.6    | 0.3  | 3.1  | 0.19              | 3.79E-08             | 4.31E-07                            |                          |
| rs76351450 | 16   | 71317533 | FTSJD1  | N764S     | G  | 14.7    | 0.1  | 2.1  | 0.25              | 4.96E-10             | 1.53E-08                            |                          |
| rs61733124 | 16   | 71682830 | PHLPP2  | R1312Q    | A  | 9.8     | 8.5  | 8.0  | 0.21              | 1.57E-08             | 6.62E-07                            | 2.91E-07                 |
| rs61733127 | 16   | 71683718 | PHLPP2  | L1016S    | G  | 4.0     | 16.1 | 6.5  | -0.23             | 5.13E-09             | 0.028                               |                          |
| rs1559401  | 16   | 72011181 | PKD1L3  | H571Q     | C  | 25.5    | 23.3 | 41.9 | 0.16              | 1.12E-11             | 5.88E-08                            |                          |
| rs7185272  | 16   | 72013797 | PKD1L3  | T429S     | G  | 25.5    | 23.2 | 41.9 | 0.16              | 1.08E-11             | 5.78E-08                            |                          |
| rs72787027 | 16   | 72033801 | PKD1L3  | P26Q      | A  | 2.7     | 20.2 | 7.0  | -0.27             | 3.25E-12             | 0.36                                |                          |
| rs2000999  | 16   | 72108093 | HPR     |           | A  | 7.0     | 18.8 | 16.7 | -0.23             | 1.57E-13             | 3.84E-14                            | 7.38E-12                 |
| rs34832584 | 16   | 72162966 | PMFBP1  | T505K     | A  | 2.4     | 16.4 | 6.2  | -0.33             | 4.05E-16             | 0.87                                |                          |
| rs35370634 | 16   | 72184566 | PMFBP1  | E48K      | A  | 2.5     | 16.4 | 6.2  | -0.33             | 2.10E-16             | -                                   | 1.41E-13                 |
| rs16970661 | 16   | 72218612 |         |           | A  | 30.7    | 0.4  | 4.7  | 0.20              | 1.40E-10             | 4.21E-10                            | 9.87E-10                 |
| rs60664312 | 16   | 75657221 | ADAT1   |           | A  | 38.9    | 4.4  | 6.5  | 0.16              | 6.50E-09             | 6.27E-08                            |                          |
| rs7201030  | 16   | 76523792 | CNTNAP4 |           | G  | 16.6    | 87.9 | 71.6 | -0.15             | 1.10E-07             | 3.52E-07                            |                          |
| rs41297245 | 22   | 36657740 | APOL1   | G96R      | A  | 4.7     | 6.2  | 2.3  | -0.25             | 4.18E-07             | 1.20E-07                            | 5.75E-08                 |

AA - amino acid; EA - effect allele; EAF - effect allele frequency; AFR - African American; EUR - European American; HIS - Hispanic. Chromosome positions are given for hg19. The AA change column shows the predicted change in amino acid sequence. Effects are reported for the less common allele in the combined DHS population.

**Supplementary Table 5.** Association of top variants identified in exome-wide analysis with CKD phenotypes

| SNP                             | Chr. | Gene          | EA | EAF (%) | ACR   |              | GFR   |         | CKD  |         | Micro-albuminuria |         | GFR < 60 |               |
|---------------------------------|------|---------------|----|---------|-------|--------------|-------|---------|------|---------|-------------------|---------|----------|---------------|
|                                 |      |               |    |         | Beta  | P-value      | Beta  | P-value | OR   | P-value | OR                | P-value | OR       | P-value       |
| <b><u>DHS combined</u></b>      |      |               |    |         |       |              |       |         |      |         |                   |         |          |               |
| rs1233421                       | 6    |               | A  | 49.1    | 0.02  | 0.415        | -0.03 | 0.186   | 1.17 | 0.089   | 1.19              | 0.084   | 1.04     | 0.813         |
| rs8052655                       | 16   | <i>LRRC36</i> | A  | 30.6    | -0.01 | 0.673        | 0.01  | 0.797   | 1.02 | 0.843   | 1.02              | 0.874   | 0.95     | 0.798         |
| rs61733124                      | 16   | <i>PHLPP2</i> | A  | 8.9     | 0.00  | 0.977        | -0.01 | 0.708   | 0.98 | 0.891   | 1.03              | 0.876   | 0.76     | 0.365         |
| rs2000999                       | 16   | <i>HPR</i>    | A  | 13.2    | 0.07  | 0.064        | -0.05 | 0.157   | 1.23 | 0.126   | 1.13              | 0.422   | 1.86     | <b>0.0060</b> |
| rs35370634                      | 16   | <i>PMFBP1</i> | A  | 7.7     | -0.04 | 0.449        | 0.04  | 0.406   | 0.89 | 0.573   | 0.88              | 0.561   | 1.09     | 0.791         |
| rs16970661                      | 16   |               | A  | 16.6    | -0.01 | 0.863        | 0.03  | 0.374   | 0.87 | 0.239   | 0.87              | 0.279   | 1.24     | 0.324         |
| rs41297245                      | 22   | <i>APOL1</i>  | A  | 4.7     | -0.07 | 0.214        | 0.04  | 0.456   | 0.59 | 0.046   | 0.62              | 0.092   | 0.25     | 0.053         |
| <b><u>African American</u></b>  |      |               |    |         |       |              |       |         |      |         |                   |         |          |               |
| rs1233421                       | 6    |               | A  | 53.5    | 0.02  | 0.640        | -0.03 | 0.289   | 1.14 | 0.260   | 1.09              | 0.485   | 1.28     | 0.244         |
| rs8052655                       | 16   | <i>LRRC36</i> | A  | 53.3    | 0.00  | 0.941        | 0.02  | 0.460   | 1.09 | 0.419   | 1.09              | 0.441   | 1.02     | 0.941         |
| rs61733124                      | 16   | <i>PHLPP2</i> | A  | 9.9     | 0.00  | 0.985        | -0.01 | 0.914   | 1.14 | 0.446   | 1.13              | 0.521   | 0.96     | 0.896         |
| rs2000999                       | 16   | <i>HPR</i>    | A  | 6.9     | 0.07  | 0.297        | -0.07 | 0.282   | 1.36 | 0.137   | 1.10              | 0.686   | 2.29     | <b>0.0080</b> |
| rs35370634                      | 16   | <i>PMFBP1</i> | A  | 2.7     | -0.06 | 0.563        | 0.09  | 0.348   | 0.99 | 0.974   | 0.86              | 0.703   | 0.77     | 0.721         |
| rs16970661                      | 16   |               | A  | 30.7    | 0.01  | 0.807        | 0.04  | 0.297   | 0.88 | 0.294   | 0.89              | 0.359   | 1.23     | 0.347         |
| rs41297245                      | 22   | <i>APOL1</i>  | A  | 4.8     | -0.14 | 0.076        | 0.04  | 0.632   | 0.60 | 0.119   | 0.70              | 0.281   | 0.00     | 0.984         |
| <b><u>European American</u></b> |      |               |    |         |       |              |       |         |      |         |                   |         |          |               |
| rs1233421                       | 6    |               | A  | 46.5    | 0.02  | 0.663        | 0.00  | 0.944   | 1.20 | 0.424   | 1.43              | 0.179   | 0.72     | 0.376         |
| rs8052655                       | 16   | <i>LRRC36</i> | A  | 4.7     | -0.10 | 0.372        | -0.01 | 0.945   | 0.41 | 0.225   | 0.00              | 0.988   | 0.97     | 0.973         |
| rs61733124                      | 16   | <i>PHLPP2</i> | A  | 8.0     | -0.02 | 0.789        | 0.03  | 0.710   | 0.63 | 0.329   | 0.92              | 0.862   | 0.31     | 0.255         |
| rs2000999                       | 16   | <i>HPR</i>    | A  | 20.2    | 0.12  | <b>0.027</b> | -0.03 | 0.575   | 1.18 | 0.514   | 1.33              | 0.323   | 1.44     | 0.332         |
| rs35370634                      | 16   | <i>PMFBP1</i> | A  | 16.7    | -0.06 | 0.338        | 0.03  | 0.584   | 0.80 | 0.470   | 1.06              | 0.865   | 0.97     | 0.949         |
| rs16970661                      | 16   |               | A  | 0.2     | -0.56 | 0.272        | 0.41  | 0.403   | 0.00 | 0.991   | 0.00              | 0.991   | 0.00     | 0.995         |
| rs41297245                      | 22   | <i>APOL1</i>  | A  | 6.2     | 0.08  | 0.400        | 0.11  | 0.199   | 0.66 | 0.416   | 0.72              | 0.574   | 0.36     | 0.312         |
| <b><u>Hispanic American</u></b> |      |               |    |         |       |              |       |         |      |         |                   |         |          |               |

|            |    |               |   |      |       |       |       |       |      |       |      |       |      |       |
|------------|----|---------------|---|------|-------|-------|-------|-------|------|-------|------|-------|------|-------|
| rs1233421  | 6  |               | A | 43.3 | 0.01  | 0.848 | -0.08 | 0.137 | 1.41 | 0.167 | 1.49 | 0.112 | 0.20 | 0.209 |
| rs8052655  | 16 | <i>LRRC36</i> | A | 9.2  | -0.21 | 0.061 | -0.11 | 0.260 | 0.49 | 0.220 | 0.51 | 0.250 | 0.00 | 0.995 |
| rs61733124 | 16 | <i>PHLPP2</i> | A | 7.6  | 0.08  | 0.450 | -0.08 | 0.409 | 0.56 | 0.265 | 0.57 | 0.291 | 0.00 | 0.995 |
| rs2000999  | 16 | <i>HPR</i>    | A | 17.6 | -0.06 | 0.435 | -0.06 | 0.416 | 1.14 | 0.672 | 1.08 | 0.802 | 2.03 | 0.440 |
| rs35370634 | 16 | <i>PMFBP1</i> | A | 6.8  | 0.09  | 0.455 | 0.11  | 0.310 | 0.50 | 0.257 | 0.53 | 0.299 | 0.00 | 0.996 |
| rs16970661 | 16 |               | A | 4.3  | -0.23 | 0.132 | -0.06 | 0.678 | 0.58 | 0.461 | 0.60 | 0.481 | 0.00 | 0.996 |
| rs41297245 | 22 | <i>APOL1</i>  | A | 2.5  | -0.11 | 0.575 | -0.15 | 0.381 | 0.53 | 0.541 | 0.00 | 0.984 | 3.70 | 0.231 |

EA - effect allele; EAF - effect allele frequency; OR - odds ratio; ACR - urine albumin/creatinine ratio; GFR - glomerular filtration rate. Microalbuminuria - ACR  $\geq$ 17 mg/g in men or  $\geq$ 25 mg/g in women. CKD - chronic kidney disease; defined as the presence of microalbuminuria and/or GFR  $<$ 60 ml/min/1.73 m<sup>2</sup>. Effects sizes (Beta) are given in s.d. units. Nominally significant p-values are shown in bold face.

**Supplementary Table 6:** Cox proportional hazards regression analysis of time to CVD event in African American participants of DHS

| Factor                                               | Number of Subjects | Number of CVD Events | Hazard Ratio (95% CI) | P-value |
|------------------------------------------------------|--------------------|----------------------|-----------------------|---------|
| Total APOL1 (nM)                                     | 1379               | 137                  | 1.000 (1.000 - 1.001) | 0.56    |
| WT APOL1 (nM)                                        | 1159               | 112                  | 1.001 (1.000 - 1.002) | 0.27    |
| G1 APOL1 (nM)                                        | 540                | 60                   | 1.000 (0.999 - 1.002) | 0.65    |
| G2 APOL1 (nM)                                        | 385                | 40                   | 1.001 (0.998 - 1.003) | 0.52    |
| G1 + G2 APOL1 (nM)                                   | 840                | 86                   | 1.000 (0.999 - 1.001) | 0.93    |
| APOL1 genotypes (2 risk alleles vs 0-1 risk alleles) | 1340               | 134                  | 1.124 (0.710 – 1.778) | 0.62    |

The end point was total cardiovascular disease outcome, defined as a first nonfatal myocardial infarction, nonfatal stroke, coronary revascularization (percutaneous coronary intervention or coronary-artery bypass grafting), peripheral revascularization, hospitalization for heart failure or atrial fibrillation, or death from cardiovascular causes. All end points were adjudicated by two cardiologists. The National Death Index was used to determine vital status for all the participants through December 31, 2010. Death from cardiovascular causes was defined according to the *International Classification of Diseases, 10th Revision*, codes I00 to I99. Individuals with a history of cardiovascular disease (self-reported history of myocardial infarction, stroke, arterial revascularization, heart failure, or arrhythmia) and persons who died within 1 year after enrollment were excluded. The median follow-up period was 9.3 years.
